# Supplementary material for: Stereochemistry of natural products from vibrational circular dichroism
Source: Royal Society of Chemistry journal article supplement (doi:10.1039/d4cc02481h), 2024-01-01
Supplement: d4cc02481h1.pdf [file d4cc02481h1.pdf]

## Stereochemistry of natural products from vibrational circular dichroism

Andrea N. L. Batista,<sup>a</sup> Alessandra L. Valverde,<sup>a</sup> Laurence A. Nafie,<sup>b</sup> and Joao M. Batista Jr.\*<sup>c</sup>

<sup>a</sup>Institute of Chemistry, Fluminense Federal University, Outeiro de São João Batista s/n, 24020-141, Niterói-RJ, Brazil.

<sup>b</sup>Department of Chemistry, 1-014CST, Syracuse University, 13244-4100, Syracuse-NY, USA.

<sup>c</sup>Federal University of São Paulo, Institute of Science and Technology, R. Talim 330, 12231-280, São José dos Campos-SP, Brazil.

### Electronic Supplementary Information

| DOI                          | Year | Authors           | Journal                                                             |
|------------------------------|------|-------------------|---------------------------------------------------------------------|
| 10.1021/acs.jnatprod.3c01013 | 2024 | dos Santos et al. | Journal of Natural Products                                         |
| 10.1021/acscentsci.3c01414   | 2024 | Zou et al.        | ACS Central Science                                                 |
| 10.1002/ange.202307053       | 2023 | Marton et al.     | Angewandte Chemie                                                   |
| 10.1002/anie.202316103       | 2023 | Kudashev et al.   | Angewandte Chemie                                                   |
| 10.1002/cbdv.202301345       | 2023 | Ge et al.         | Chemistry and Biodiversity                                          |
| 10.1002/chir.23571           | 2023 | Wood et al.       | Chirality                                                           |
| 10.1016/j.bioorg.2023.106863 | 2023 | Cao et al.        | Bioorganic Chemistry                                                |
| 10.1016/j.fitote.2022.105359 | 2023 | Cao et al.        | Fitoterapia                                                         |
| 10.1016/j.saa.2023.123283    | 2023 | Batista et al.    | Spectrochimica Acta Part A: Molecular and Biomolecular Spectroscopy |
| 10.1021/acs.jnatprod.2c01145 | 2023 | Seipp et al.      | Journal of Natural Products                                         |
| 10.1039/D3CP00886J           | 2023 | Vermeyen et al.   | PCCP                                                                |

|                                   |      |                         |                                         |
|-----------------------------------|------|-------------------------|-----------------------------------------|
| 10.1039/D3CP01986A                | 2023 | Batista Jr and Nicu     | PCCP                                    |
| 10.3390/md21030153                | 2023 | Pulat et al.            | Marine Drugs                            |
| 10.1002/ajoc.202200182            | 2022 | Pinto et al.            | Asian Journal of Organic Chemistry      |
| 10.1002/ardp.202100441            | 2022 | Gubiani et al.          | Archiv der Pharmazie                    |
| 10.1002/chir.23511                | 2022 | Puente et al.           | Chirality                               |
| 10.1002/chir.23517                | 2022 | Munoz et al.            | Chirality                               |
| 10.1016/j.comptc.2022.113952      | 2022 | Amara et al.            | Computational and Theoretical Chemistry |
| 10.1016/j.foodchem.2022.133359    | 2022 | Buffeteau et al.        | Food Chemistry                          |
| 10.1016/j.tetlet.2022.154241      | 2022 | Batista et al.          | Tetrahedron Letters                     |
| 10.1021/acs.jnatprod.2c00054      | 2022 | Avalon et al.           | Journal of Natural Products             |
| 10.1021/acs.orglett.2c02525       | 2022 | Koser et al.            | Organic Letters                         |
| 10.1039/D1OB02170B                | 2022 | Yokomichi et al.        | Organic & Biomolecular Chemistry        |
| 10.1177/1934578X221095342         | 2022 | Munoz et al.            | Natural Products Communications         |
| 10.2174/1568026622666220707095718 | 2022 | Monteiro et al.         | Current Topics in Medicinal Chemistry   |
| 10.3390/molecules28010214         | 2022 | Le et al.               | Molecules                               |
| 10.1002/chir.23301                | 2021 | Johnson et al.          | Chirality                               |
| 10.1002/chir.23390                | 2021 | Fuentes-Figueroa et al. | Chirality                               |
| 10.1016/j.bioorg.2021.105064      | 2021 | Ryu et al.              | Bioorganic Chemistry                    |
| 10.1016/j.molstruc.2020.129147    | 2021 | Quevedo-Tinoco et al.   | Journal of Molecular Structure          |
| 10.1016/j.saa.2020.119140         | 2021 | Valera et al.           | Spectrochimica Acta A                   |
| 10.1021/acs.jnatprod.0c01261      | 2021 | Pouny et al.            | Journal of Natural Product              |
| 10.1021/acs.jnatprod.0c01303      | 2021 | Londero et al.          | Journal of Natural Products             |
| 10.1039/D1CC00932J                | 2021 | Demarque et al.         | Chemical Communications                 |
| 10.3390/biom11121902              | 2021 | Mazzeo et al.           | Biomolecules                            |
| 10.1002/chir.23289                | 2020 | Munoz and Joseph-Nathan | Chirality                               |
| 10.1016/j.molstruc.2020.128987    | 2020 | del Rio et al.          | Journal of Molecular Structure          |
| 10.1021/acs.jnatprod.0c00203      | 2020 | Lydon et al.            | Journal of Natural Product              |
| 10.1021/acs.jnatprod.0c00324      | 2020 | Hendges et al.          | Journal of Natural Product              |
| 10.1021/acs.jnatprod.0c00492      | 2020 | Subeh et al.            | Journal of Natural Product              |
| 10.1021/acs.jnatprod.0c00618      | 2020 | Al-Khdhairawi et al.    | Journal of Natural Product              |
| 10.1021/acs.jnatprod.9b00635      | 2020 | Rodriguez et al.        | Journal of Natural Products             |

|                                 |      |                         |                                           |
|---------------------------------|------|-------------------------|-------------------------------------------|
| 10.1021/acs.jnatprod.9b01024    | 2020 | Bisio et al.            | Journal of Natural Products               |
| 10.1021/acs.jnatprod.9b01119    | 2020 | Cao et al.              | Journal of Natural Products               |
| 10.1021/acs.orglett.0c01593     | 2020 | Ding et al.             | Organic Letters                           |
| 10.1039/D0CC00855A              | 2020 | Chen et al.             | Chemical Communication                    |
| 10.1039/d0cc03838e              | 2020 | Demarque et al.         | Chemical Communications                   |
| 10.1039/D0CP03257C              | 2020 | Bogaerts et al.         | PCCP                                      |
| 10.1039/D0OB00519C              | 2020 | Morishita et al.        | Organic and Biomolecular Chemistry        |
| 10.1080/14786419.2020.1827400   | 2020 | Fuentes et al.          | Natural Product Research                  |
| 10.21577/0103-5053.20200116     | 2020 | Lianza et al.           | Journal of the Brazilian Chemical Society |
| 10.3390/molecules25133005       | 2020 | Caldas et al.           | Molecules                                 |
| 10.1002/chir.23042              | 2019 | Rodriguez-Garcia et al. | Chirality                                 |
| 10.1002/chir.23061              | 2019 | Rio-Chavez et al.       | Chirality                                 |
| 10.1016/j.jep.2019.112320       | 2019 | Queiroz et al.          | Journal of Ethnopharmacology              |
| 10.1016/j.phytochem.2019.03.024 | 2019 | Gimenes et al.          | Phytochemistry                            |
| 10.1016/j.phytol.2019.06.003    | 2019 | Gubiani et al.          | Phytochemistry Letters                    |
| 10.1016/j.tet.2019.01.028       | 2019 | Ren et al.              | Tetrahedron                               |
| 10.1016/j.tetlet.2019.151227    | 2019 | Kim et al.              | Tetrahedron Letters                       |
| 10.1021/acs.jnatprod.8b00791    | 2019 | Reinhardt et al.        | Journal of Natural Products               |
| 10.1021/acs.jnatprod.8b00855    | 2019 | Pardo-Novoa et al.      | Journal of Natural Products               |
| 10.1021/acs.jnatprod.8b00952    | 2019 | Bustos-Brito et al.     | Journal of Natural Products               |
| 10.1021/acs.jnatprod.8b01015    | 2019 | Cai et al.              | Journal of Natural Products               |
| 10.1021/acs.jnatprod.8b01030    | 2019 | Cao et al.              | Journal of Natural Products               |
| 10.1021/acs.jnatprod.9b00125    | 2019 | El-Kashef et al.        | Journal of Natural Products               |
| 10.1021/acs.jnatprod.9b00734    | 2019 | Arreaga-Gonzalez et al. | Journal of Natural Products               |
| 10.1021/acs.jpcc.9b08375        | 2019 | Fuse et al.             | Journal of Physical Chemistry B           |
| 10.1021/acs.orglett.8b03769     | 2019 | El-Elimat et al.        | Organic Letters                           |
| 10.1021/acs.orglett.8b04086     | 2019 | Melot et al.            | Organic Letters                           |
| 10.1021/acs.orglett.9b01674     | 2019 | Morishita et al.        | Organic Letters                           |
| 10.1021/acsomega.8b03678        | 2019 | Johnson et al.          | ACS Omega                                 |
| 10.1021/acsomega.9b02108        | 2019 | De Gussem et al.        | ACS Omega                                 |
| 10.1038/s41598-019-48655-7      | 2019 | Medina et al.           | Scientific Reports                        |

|                                 |      |                         |                                           |
|---------------------------------|------|-------------------------|-------------------------------------------|
| 10.1039/C9OB02010A              | 2019 | Batista et al.          | Organic and Biomolecular Chemistry        |
| 10.1039/C9RA05469C              | 2019 | Tran-Cong et al.        | RSC Advances                              |
| 10.21577/0103-5053.20190194     | 2019 | Ortega et al.           | Journal of the Brazilian Chemical Society |
| 10.3390/molecules24173022       | 2019 | Santoro et al.          | Molecules                                 |
| 10.1002/cbic.201800467          | 2018 | Otlieb et al.           | ChemBioChem                               |
| 10.1002/chir.22803              | 2018 | Demarque et al.         | Chirality                                 |
| 10.1016/j.fitote.2018.06.013    | 2018 | Vergura et al.          | Fitoterapia                               |
| 10.1016/j.phytochem.2017.12.019 | 2018 | Rusman et al.           | Phytochemistry                            |
| 10.1016/j.tetlet.2017.12.002    | 2018 | Canzi et al.            | Tetrahedron Letters                       |
| 10.1021/acs.joc.8b02450         | 2018 | Kauhl et al.            | Journal of Organic Chemistry              |
| 10.1021/acs.jpcc.7b10278        | 2018 | Chatterjee et al.       | Journal of Physical Chemistry B           |
| 10.1021/acs.orglett.8b03684     | 2018 | Afoullouss et al.       | Organic Letters                           |
| 10.1038/s41598-018-28996-5      | 2018 | Zhu et al.              | Scientific Reports                        |
| 10.1039/c7sc04249c              | 2018 | Joyce et al.            | Chemical Science                          |
| 10.1039/C8OB01085D              | 2018 | Santos Jr et al.        | Organic & Biomolecular Chemistry          |
| 10.1080/14786419.2018.1493590   | 2018 | Cao et al.              | Natural Product Research                  |
| 10.1002/ange.201707539          | 2017 | Wang et al.             | Angewandte Chemie                         |
| 10.1002/chir.22708              | 2017 | Merten et al.           | Chirality                                 |
| 10.1002/chir.22741              | 2017 | Julio et al.            | Chirality                                 |
| 10.1002/chir.22781              | 2017 | Esquivel et al.         | Chirality                                 |
| 10.1016/j.molstruc.2017.06.040  | 2017 | Wang et al.             | Journal of Molecular Structure            |
| 10.1016/j.tet.2017.05.002       | 2017 | Cheng et al.            | Tetrahedron                               |
| 10.1016/j.tet.2017.10.018       | 2017 | Masi et al.             | Tetrahedron                               |
| 10.1016/j.tetasy.2017.10.025    | 2017 | Ccana-Ccapatinta et al. | Tetrahedron: Asymmetry                    |
| 10.1016/j.tetlet.2017.11.008    | 2017 | Ortega et al.           | Tetrahedron Letters                       |
| 10.1021/acs.jnatprod.7b00119    | 2017 | Mazzeo et al.           | Journal of Natural Products               |
| 10.1021/acs.jnatprod.7b00193    | 2017 | Melchor-Martinez et al. | Journal of Natural Products               |
| 10.1021/acs.jnatprod.7b00300    | 2017 | Jimenez-Romero et al.   | Journal of Natural Products               |
| 10.1021/acs.jnatprod.7b00331    | 2017 | Aparicio-Cuevas et al.  | Journal of Natural Products               |
| 10.1021/acs.jnatprod.7b00637    | 2017 | Arreaga-Gonzalez et al. | Journal of Natural Products               |
| 10.1021/acsmedchemlett.7b00033  | 2017 | Guo et al.              | ACS Medicinal Chemistry Letters           |

|                                |      |                            |                                        |
|--------------------------------|------|----------------------------|----------------------------------------|
| 10.1038/s41598-017-12841-2     | 2017 | Cao et al.                 | Scientific Reports                     |
| 10.1039/C7RA07351H             | 2017 | Rehman et al.              | RSC Advances                           |
| 10.3390/md15080245             | 2017 | Smyrniotopoulos et al.     | Marine Drugs                           |
| 10.3390/molecules22040519      | 2017 | Rossi et al.               | Molecules                              |
| 10.3390/molecules22101690      | 2017 | Esquivel et al.            | Molecules                              |
| 10.1002/anie.201602910         | 2016 | Mizutani et al.            | Angewandte                             |
| 10.1002/chir.22595             | 2016 | Ortega et al.              | Chirality                              |
| 10.1002/chir.22606             | 2016 | Mandi et al.               | Chirality                              |
| 10.1002/chir.22672             | 2016 | Said et al.                | Chirality                              |
| 10.1002/jssc.201600061         | 2016 | Minoz et al.               | Journal of Separation Science          |
| 10.1002/mrc.4554               | 2016 | Ortega et al.              | Magnetic Resonance in Chemistry        |
| 10.1016/j.aca.2015.11.010      | 2016 | Said et al.                | Analytica Chimica acta                 |
| 10.1016/j.molstruc.2015.10.061 | 2016 | Reinscheid and Reinscheid  | Journal of Molecular Structure         |
| 10.1016/j.molstruc.2015.10.062 | 2016 | Reinscheid et al.          | Journal of Molecular Structure         |
| 10.1016/j.tet.2016.09.053      | 2016 | Xu et al.                  | Tetrahedron                            |
| 10.1016/j.tetasy.2016.01.010   | 2016 | Velazquez-Jimenez et al.   | Tetrahedron: Asymmetry                 |
| 10.1016/j.tetasy.2016.03.011   | 2016 | Jimenez-Romero et al.      | Tetrahedron: Asymmetry                 |
| 10.1016/j.tetasy.2016.07.007   | 2016 | Avula et al.               | Tetrahedron: Asymmetry                 |
| 10.1016/j.tetasy.2016.11.006   | 2016 | Burgueno-Tapia et al.      | Tetrahedron: Asymmetry                 |
| 10.1021/acs.jnatprod.5b01082   | 2016 | Zhang et al.               | Journal of Natural Products            |
| 10.1021/acs.jnatprod.6b00011   | 2016 | Cheng et al.               | Journal of Natural Products            |
| 10.1021/acs.jnatprod.6b00395   | 2016 | Covington et al.           | Journal of Natural Products            |
| 10.1021/acs.jnatprod.6b00491   | 2016 | Pardo-Novoa et al.         | Journal of Natural Products            |
| 10.1039/c5ob01595b             | 2016 | Asai et al.                | Organic and Biomolecular Chemistry     |
| 10.1039/C6CC01689H             | 2016 | Ren et al.                 | Chemical Communications                |
| 10.1039/C6CP07171F             | 2016 | Passarelli et al.          | PCCP                                   |
| 10.1039/C6OB00049E             | 2016 | Sprenger et al.            | Organic and Biomolecular Chemistry     |
| 10.1002/chir.22420             | 2015 | Sanchez-Castellanos et al. | Chirality                              |
| 10.1002/chir.22486             | 2015 | Andrade et al.             | Chirality                              |
| 10.1002/jssc.201500138         | 2015 | Krief et al.               | Journal of Separation Science          |
| 10.1007/s00216-015-9046-y      | 2015 | Yao et al.                 | Analytical and Bioanalytical Chemistry |

|                                 |      |                           |                                          |
|---------------------------------|------|---------------------------|------------------------------------------|
| 10.1016/j.aca.2015.06.061       | 2015 | Cretin et al.             | Analytica Chimica acta                   |
| 10.1016/j.phytochem.2015.03.001 | 2015 | Santoro et al.            | Phytochemistry                           |
| 10.1016/j.tetasy.2014.12.003    | 2015 | Cerda-Garcia-Rojas et al. | Tetrahedron: Asymmetry                   |
| 10.1016/j.tetasy.2015.05.009    | 2015 | Cordero-Rivera et al.     | Tetrahedron: Asymmetry                   |
| 10.1016/j.tetlet.2015.09.102    | 2015 | Batista Jr et al.         | Tetrahedron Letters                      |
| 10.1021/acs.jnatprod.5b00488    | 2015 | Bustos-Brito et al.       | Journal of Natural Products              |
| 10.1021/acs.jnatprod.5b00546    | 2015 | Santos Jr et al.          | Journal of Natural Products              |
| 10.1021/acs.joc.5b02526         | 2015 | Kauhl et al.              | Journal of Organic Chemistry             |
| 10.1021/acs.jpca.5b07940        | 2015 | Covington et al.          | Journal of Physical Chemistry A          |
| 10.1021/jo5022647               | 2015 | Bultinck et al.           | Journal of Organic Chemistry             |
| 10.1021/jo5024409               | 2015 | Schulze et al.            | Journal of Organic Chemistry             |
| 10.1039/c5cc05659d              | 2015 | Merten et al.             | Chemical Communications                  |
| 10.1002/chem.201404822          | 2014 | De Gussem et al.          | Chemistry - A European Journal           |
| 10.1002/ejoc.201402540          | 2014 | Andernach and Opatz       | European Journal of Organic Chemistry    |
| 10.1002/ejoc.201402741          | 2014 | Ferrie et al.             | European Journal of Organic Chemistry    |
| 10.1002/ejoc.201403189          | 2014 | Wink et al.               | European Journal of Organic Chemistry    |
| 10.1002/hlca.201300395          | 2014 | Virgili et al.            | Helvetica Chimica Acta                   |
| 10.1016/j.tetasy.2014.09.001    | 2014 | Buendia-Trujillo et al.   | Tetrahedron: Asymmetry                   |
| 10.1016/j.tetlet.2014.03.012    | 2014 | Ortega                    | Tetrahedron Letters                      |
| 10.1021/ja501630w               | 2014 | Prag et al.               | JACS                                     |
| 10.1021/np400742p               | 2014 | Derewacz et al.           | Journal of Natural Products              |
| 10.1021/np400964w               | 2014 | Bustos-Brito et al.       | Journal of Natural Products              |
| 10.1021/np500022w               | 2014 | Garcia-Sanchez et al.     | Journal of Natural Products              |
| 10.1021/np500178s               | 2014 | Williams et al.           | Journal of Natural Products              |
| 10.1021/np5002253               | 2014 | Du et al.                 | Journal of Natural Products              |
| 10.1021/np500363e               | 2014 | Santos Jr et al.          | Journal of Natural Products              |
| 10.1021/np500427v               | 2014 | Buffeteau et al.          | Journal of Natural Products              |
| 10.1021/np500735f               | 2014 | Casero et al.             | Journal of Natural Products              |
| 10.7503/cjcu20131023            | 2014 | Yannan et al.             | Chemical Journal of Chinese Universities |
| 10.1002/anie.201306549          | 2013 | Du et al.                 | Angewandte                               |
| 10.1002/chir.22238              | 2013 | Gordillo-Roman et al.     | Chirality                                |

|                                 |      |                          |                                            |
|---------------------------------|------|--------------------------|--------------------------------------------|
| 10.1002/ejoc.201300530          | 2013 | Andernach et al.         | European Journal of Organic Chemistry      |
| 10.1016/j.phytochem.2012.11.014 | 2013 | Penicooke et al.         | Phytochemistry                             |
| 10.1016/j.phytochem.2013.09.028 | 2013 | Gomez-Hurtado et al.     | Phytochemistry                             |
| 10.1016/j.tet.2013.10.004       | 2013 | Ren et al.               | Tetrahedron                                |
| 10.1021/jf401946d               | 2013 | Li et al.                | Journal of Agricultural and Food Chemistry |
| 10.1021/jm301816a               | 2013 | Bara et al.              | Journal of Medicinal Chemistry             |
| 10.1021/jo401846m               | 2013 | Aviles et al.            | Journal of Organic Chemistry               |
| 10.1021/jo401859u               | 2013 | Lin et al.               | Journal of Organic Chemistry               |
| 10.1021/np300770s               | 2013 | Mazzeo et al.            | Journal of Natural Products                |
| 10.1021/ol401741z               | 2013 | Asai et al.              | Organic Letters                            |
| 10.1021/ol401891z               | 2013 | Cai et al.               | Organic Letters                            |
| 10.1039/C3OB42376J              | 2013 | Gorecki et al.           | Organic and Biomolecular Chemistry         |
| 10.1016/j.phytochem.2011.10.005 | 2012 | Burgueno-Tapia et al     | Phytochemistry                             |
| 10.1016/j.phytochem.2012.04.014 | 2012 | Munoz et al.             | Phytochemistry                             |
| 10.1016/j.tetlet.2012.08.113    | 2012 | Batista Jr et al.        | Tetrahedron Letters                        |
| 10.1021/jo201598x               | 2012 | Hopmann et al.           | Journal of Organic Chemistry               |
| 10.1021/np200436h               | 2012 | Socolsky et al.          | Journal of Natural Products                |
| 10.1021/np200910u               | 2012 | Gutierrez-Nicolas et al. | Journal of Natural Products                |
| 10.1021/np200951y               | 2012 | Munoz et al.             | Journal of Natural Products                |
| 10.1021/np300473h               | 2012 | Du et al.                | Journal of Natural Products                |
| 10.1021/ol302539s               | 2012 | Asai et al.              | Organic Letters                            |
| 10.1039/c2ob25109d              | 2012 | Felippe et al.           | Organic and Biomolecular Chemistry         |
| 10.1080/14786419.2012.725400    | 2012 | Zhang et al.             | Natural Product Research                   |
| 10.3987/COM-12-12514            | 2012 | Munoz et al.             | Heterocycles                               |
| 10.1002/chir.21036              | 2011 | Gordillo-Roman et al.    | Chirality                                  |
| 10.1016/j.phytochem.2011.01.021 | 2011 | Gomez-Hurtado et al.     | Phytochemistry                             |
| 10.1016/j.phytochem.2011.07.017 | 2011 | Velazquez-Jimenez et al. | Phytochemistry                             |
| 10.1021/jo1025089               | 2011 | Batista Jr et al.        | Journal of Organic Chemistry               |
| 10.1021/jp202501y               | 2011 | Polavarapu et al.        | Journal of Physical Chemistry A            |
| 10.1021/np100512w               | 2011 | Polavarapu et al.        | Journal of Natural Products                |
| 10.1021/np1007763               | 2011 | Nakahashi et al.         | Journal of Natural Products                |

|                                 |      |                           |                                            |
|---------------------------------|------|---------------------------|--------------------------------------------|
| 10.1021/np200020t               | 2011 | Amesty et al.             | Journal of Natural Products                |
| 10.1021/np2000667               | 2011 | Molina-Salinas et al.     | Journal of Natural Products                |
| 10.1021/np200085h               | 2011 | Batista Jr et al.         | Journal of Natural Products                |
| 10.1021/np200445y               | 2011 | Manriquez-Torres et al.   | Journal of Natural Products                |
| 10.1248/cpb.59.161              | 2011 | Perez et al.              | Chemical and Pharmaceutical Bulletin       |
| 10.1002/chir.20788              | 2010 | Monde et al.              | Chirality                                  |
| 10.1002/chir.20797              | 2010 | Polavarapu et al.         | Chirality                                  |
| 10.1002/chir.20801              | 2010 | Munoz et al.              | Chirality                                  |
| 10.1016/j.phytochem.2010.02.004 | 2010 | Reina et al.              | Phytochemistry                             |
| 10.1016/j.phytochem.2010.04.005 | 2010 | Burgueno-Tapia et al.     | Phytochemistry                             |
| 10.1016/j.tetasy.2010.09.004    | 2010 | Batista Jr et al.         | Tetrahedron: Asymmetry                     |
| 10.1021/np900553p               | 2010 | Areche et al.             | Journal of Natural Products                |
| 10.1002/chem.200900749          | 2009 | Krohn et al.              | Chemistry - A European Journal             |
| 10.1002/chir.20776              | 2009 | Devlin et al.             | Chirality                                  |
| 10.1021/jf901439v               | 2009 | Emura et al.              | Journal of Agricultural and Food Chemistry |
| 10.1021/ol900065x               | 2009 | Cedron et al.             | Organic Letters                            |
| 10.1055/s-0029-1186080          | 2009 | Cerda-Garcia-Rojas et al. | Planta Medica                              |
| 10.1002/chir.20466              | 2008 | Taniguchi et al.          | Chirality                                  |
| 10.1016/j.phytochem.2008.05.011 | 2008 | Burgueno-Tapia et al.     | Phytochemistry                             |
| 10.1021/np8000927               | 2008 | Cerda-Garcia-Rojas et al. | Journal of Natural Products                |
| 10.1021/np800387w               | 2008 | Torres-Valencia et al.    | Journal of Natural Products                |
| 10.1021/ol801620u               | 2008 | Aoyagi et al.             | Organic Letters                            |
| 10.1039/b813437e                | 2008 | Taniguchi et al.          | Organic and Biomolecular Chemistry         |
| 10.1021/jo062567p               | 2007 | Stephens et al.           | Journal of Organic Chemistry               |
| 10.1021/jo070155q               | 2007 | Stephens et al.           | Journal of Organic Chemistry               |
| 10.1021/jo071183b               | 2007 | Stephens et al.           | Journal of Organic Chemistry               |
| 10.1021/np0605992               | 2007 | Cerda-Garcia-Rojas et al. | Journal of Natural Products                |
| 10.1021/np070154t               | 2007 | Krautmann et al.          | Journal of Natural Products                |
| 10.1021/np070202+               | 2007 | Krohn et al.              | Journal of Natural Products                |
| 10.1039/b717440c                | 2007 | Figadere et al.           | Chemical Communications                    |
| 10.1002/chir.20259              | 2006 | Monde et al.              | Chirality                                  |



|                                |      |                  |                                    |
|--------------------------------|------|------------------|------------------------------------|
| 10.1016/j.molstruc.2006.01.030 | 2006 | Bercion et al.   | Journal of Molecular Structure     |
| 10.1021/np060112p              | 2006 | Stephens et al.  | Journal of Natural Products        |
| 10.1021/np060133j              | 2006 | Munoz et al.     | Journal of Natural Products        |
| 10.1016/j.bmc.2005.06.001      | 2005 | Monde et al.     | Bioorganic and Medicinal Chemistry |
| 10.1016/j.bmc.2005.06.020      | 2005 | Cichewicz et al. | Bioorganic and Medicinal Chemistry |
| 10.1021/np0502995              | 2005 | Lassen et al.    | Journal of Natural Products        |
| 10.1016/S0957-4166(98)00099-8  | 1998 | Ashvar et al.    | Tetrahedron: Asymmetry             |
